# Supplementary material for: UBE2C mediated radiotherapy resistance of head and neck squamous cell carcinoma by regulating oxidative-stress-relative apoptosis
Source: publisher site journal article supplement (doi:10.18632/aging.204265), 2022-09-05
Supplement: Supplementary file [file aging-v14i17-204265-supplementary-material-SD1.pdf]

## SUPPLEMENTARY FIGURES

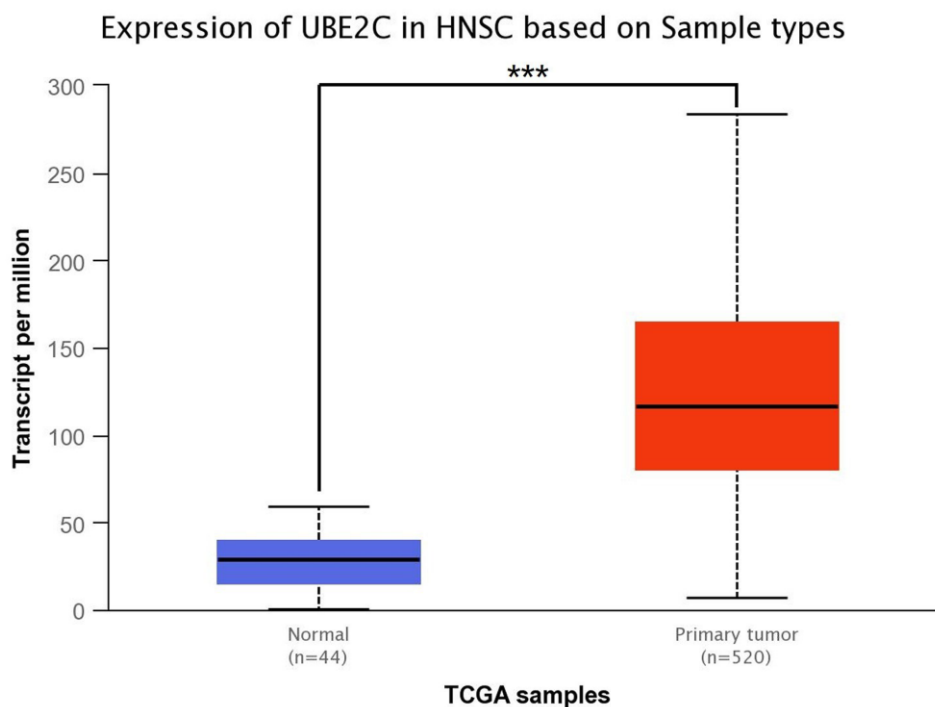

Supplementary Figure 1. The expression of UBE2C by performed numerical matched condition analysis (Tumor group, N=520. Normal group, N=44.). \*\*\* $P < 0.001$  versus the normal group. ( $P = 1.62e-12$ ).

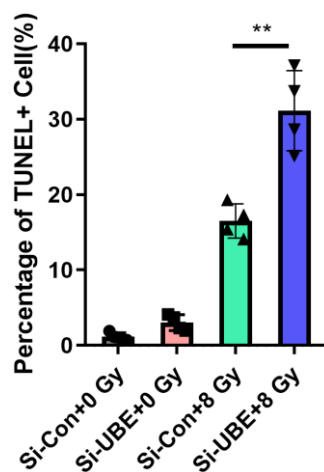

Supplementary Figure 2. The statistical graph of TUNEL. \* $P < 0.05$ , \*\* $P < 0.01$ , \*\*\* $P < 0.001$  versus the control.
